# Supplementary material for: Coke-resistant defect-confined Ni-based nanosheet-like catalysts derived from halloysites for CO2 reforming of methane
Source: Royal Society of Chemistry journal article supplement (doi:10.1039/c8nr02006j), 2018-01-01
Supplement: c8nr02006j1.pdf [file c8nr02006j1.pdf]

Electronic Supplementary Material (ESI)

**Coke-resistant defect-confined Ni-based nanosheet-like catalysts  
derived from halloysites for CO<sub>2</sub> reforming of methane**

Meirong Lu,<sup>a‡</sup> Jianhui Fang,<sup>a‡</sup> Lupeng Han,<sup>a</sup> Kajornsak Faungnawakij,<sup>c</sup> Hongrui Li,<sup>a</sup> Sixiang Cai,<sup>b</sup>  
Liyi Shi,<sup>a</sup> Hong Jiang,<sup>b</sup> and Dengsong Zhang<sup>a\*</sup>

<sup>a</sup> Department of Chemistry, Research Center of Nano Science and Technology, Shanghai  
University, No.99 of Shangda Road, Shanghai 200444, P.R. China

<sup>b</sup> State Key Laboratory of Marine Resource Utilization in South China Sea, Hainan University, No.  
58 of Renmin Avenue, Haikou 570228, P.R. China

<sup>c</sup> National Nanotechnology Center, National Science and Development Agency, 111 Thailand  
Science Park, Klong Neung, KlongLuang, Pathum Thani 12120, Thailand

<sup>‡</sup> These authors contributed equally to this work.

\*Corresponding author. Tel. & Fax: (+86) 21-66137152; E-mail: dszhang@shu.edu.cn

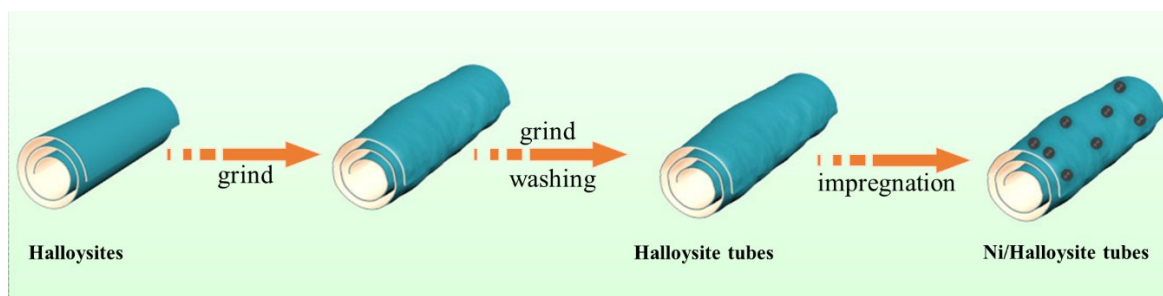

**Scheme S1.** Schematic illustration of the fabrication strategy of the Ni/HA tubes.

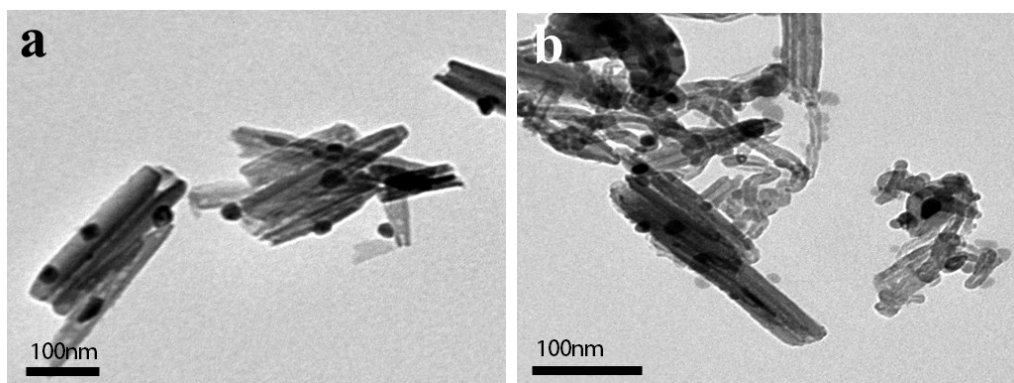

**Fig. S1** TEM images of (a) Ni/HA tubes reduced at 750 °C for 1h b) Ni/HA tubes after the 20 h stability test.

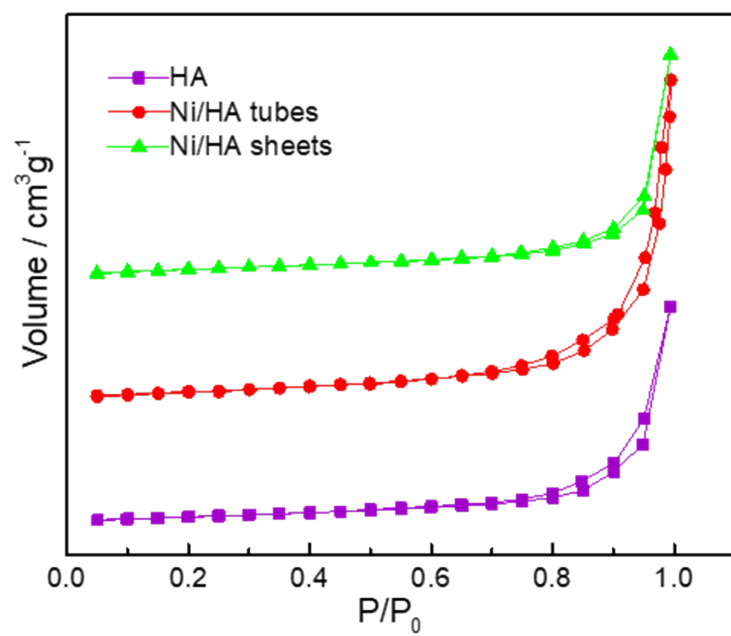

**Fig. S2** N<sub>2</sub> sorption isotherms of HA, Ni/HA tubes and Ni/HA sheets.

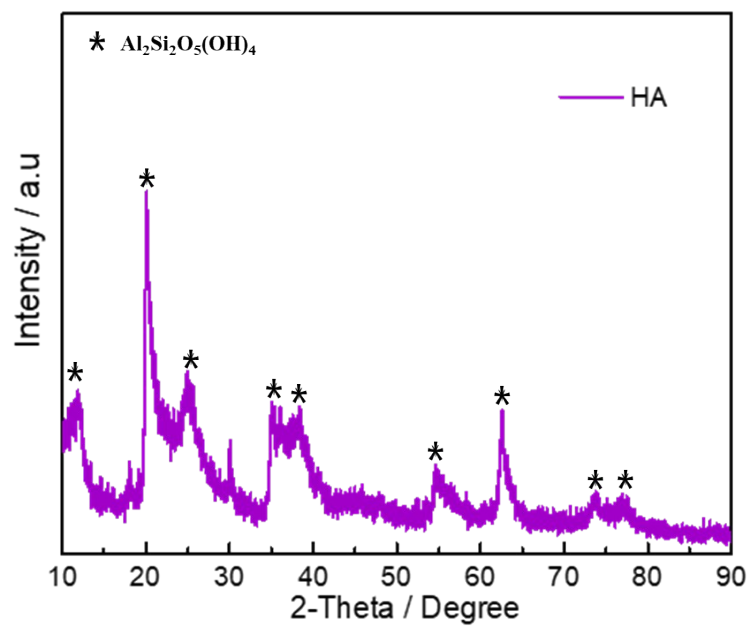

**Fig. S3** XRD patterns of HA.

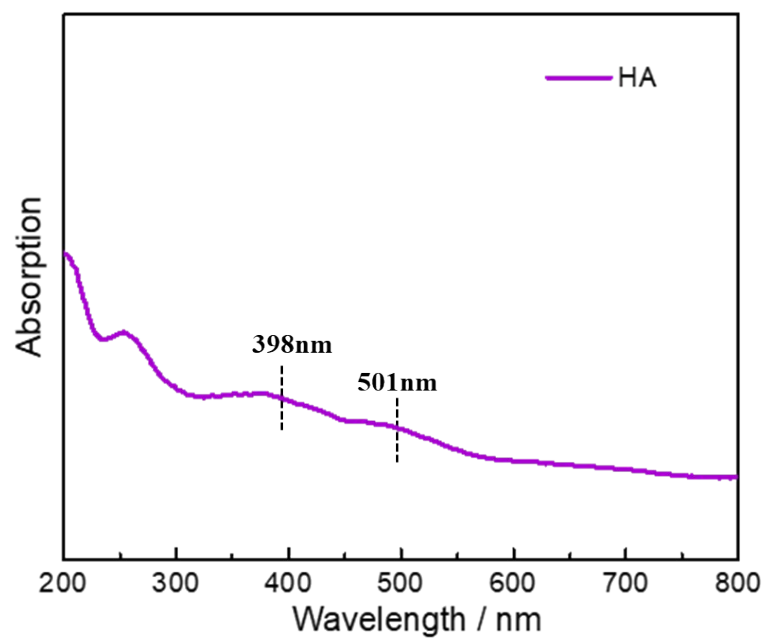

**Fig. S4** UV-Vis spectra of HA.

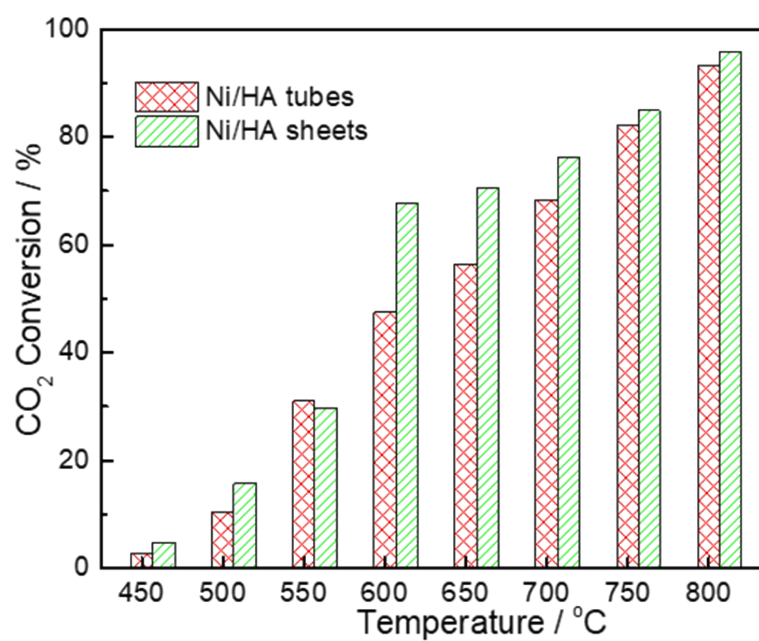

**Fig. S5** Effects of reaction temperature on CO<sub>2</sub> conversion over the catalysts.

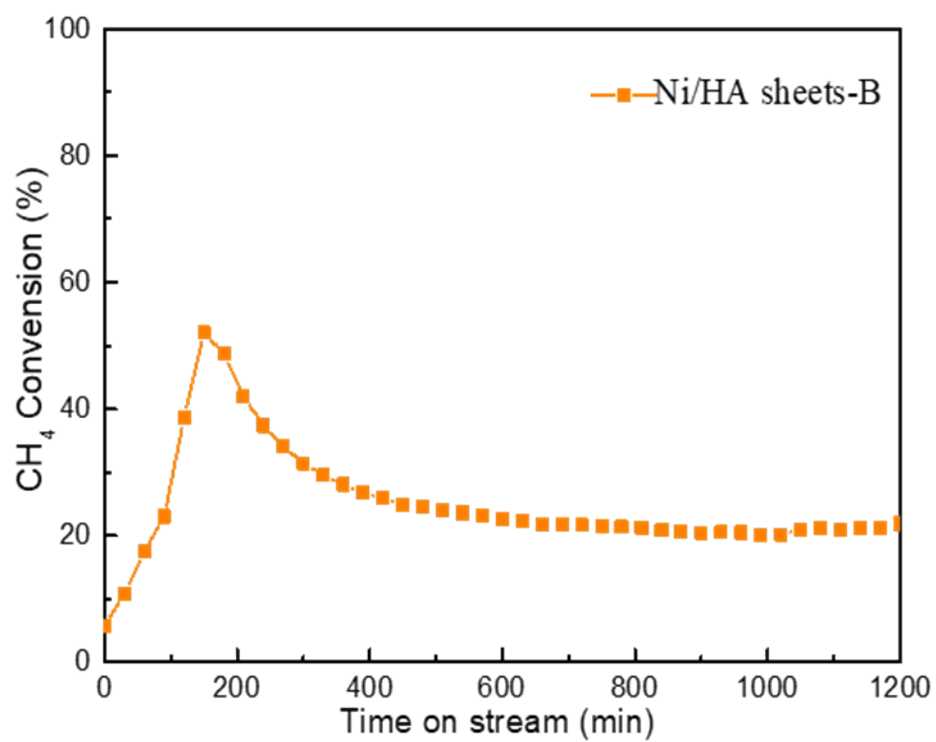

**Fig. S6** CH<sub>4</sub> reforming of methane stability of the Ni/ HA sheets-B catalyst: CH<sub>4</sub> conversion as a function of reaction time (GHSV = 15,000 mL h<sup>-1</sup>gcat<sup>-1</sup>, 750 °C, 1 atm).



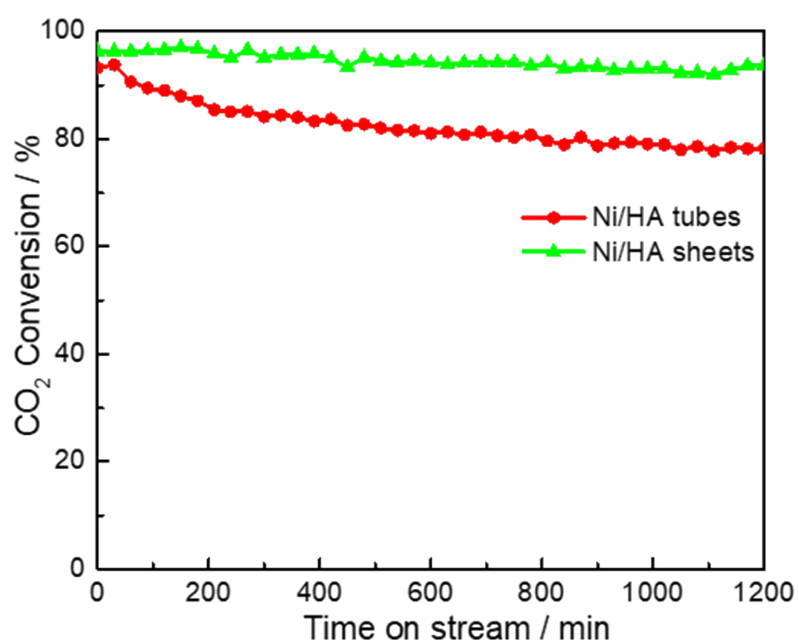

**Fig. S7** CO<sub>2</sub> reforming of methane stability of the catalysts: CO<sub>2</sub> conversion as a function of reaction time (GHSV = 15,000 mL h<sup>-1</sup>gcat<sup>-1</sup>, 750 °C, 1 atm).

**Table S1** Comparison of the previously reported Ni catalysts.

| Catalysts                                            | Temp. (°C) | Time X<br>(h) | CH <sub>4</sub> conv. | CH <sub>4</sub> conv. | References |
|------------------------------------------------------|------------|---------------|-----------------------|-----------------------|------------|
|                                                      |            |               | (%)                   | (%)                   |            |
|                                                      |            |               | T=0h                  | T=Xh                  |            |
| Ni/ZrO <sub>2</sub>                                  | 750        | 12            | 53                    | 33                    | ref. 1     |
| 10Ni15Ce/illite                                      | 800        | 4             | 88                    | 84                    | ref. 2     |
| Ni/SiO <sub>2</sub> -F                               | 700        | 6             | 62                    | 56                    | ref. 3     |
| LaNi <sub>0.4</sub> Ce <sub>0.6</sub> O <sub>3</sub> | 800        | 10            | 91                    | 80                    | ref. 4     |
| 10Ni15La/illite                                      | 800        | 25            | 80                    | 78                    | ref. 5     |
| Ni/HA sheets                                         | 750        | 20            | 89                    | 88                    | This work  |

**Table S2** Comparison of TOF<sub>CH<sub>4</sub></sub> of the previously reported Ni catalysts.

| Catalysts                         | Temp. (°C) | Time X<br>(h) | TOF <sub>CH<sub>4</sub></sub> <sup>c</sup><br>(h <sup>-1</sup> ) | References |
|-----------------------------------|------------|---------------|------------------------------------------------------------------|------------|
| Ni/SBA-16                         | 700        | 100           | 1728                                                             | ref. 6     |
| Ni–MgO–ZrO <sub>2</sub>           | 800        | 5             | 1577                                                             | ref. 7     |
| Co/Al <sub>2</sub> O <sub>3</sub> | 750        | 20            | 1584                                                             | ref. 8     |
| Ni/HA sheets                      | 750        | 20            | 2175                                                             | This work  |

**Table S3** The TOF<sub>CH<sub>4</sub></sub> of the as-prepared catalysts during the DRM reaction at 500 °C and textural properties of the spent catalysts.

| Catalysts    | Temp.<br>(°C) | Time X<br>(h) | Surface<br>area <sup>a</sup><br>(m <sup>2</sup> g <sup>-1</sup> ) | Ni dispersion <sup>b</sup> (%) |             | TOF <sub>CH<sub>4</sub></sub> <sup>c</sup> (h <sup>-1</sup> ) |            |
|--------------|---------------|---------------|-------------------------------------------------------------------|--------------------------------|-------------|---------------------------------------------------------------|------------|
|              |               |               |                                                                   | t = 10 min                     | t = 360 min | t = 10min                                                     | t = 360min |
| Ni/HA tubes  | 550           | 6             | 51                                                                | 0.98%                          | 0.37%       | 790                                                           | 624        |
| Ni/HA sheets | 550           | 6             | 55                                                                | 0.33%                          | 0.34%       | 2175                                                          | 2169       |

<sup>a</sup> Specific surface area of the spent catalysts after the 20 h stability test determined by the BET method.

<sup>b</sup> Ni dispersion were measured by H<sub>2</sub> pulse chemisorption.

<sup>c</sup> The value of TOF was tested at 550°C with CH<sub>4</sub> flowing of 45 ml/min.

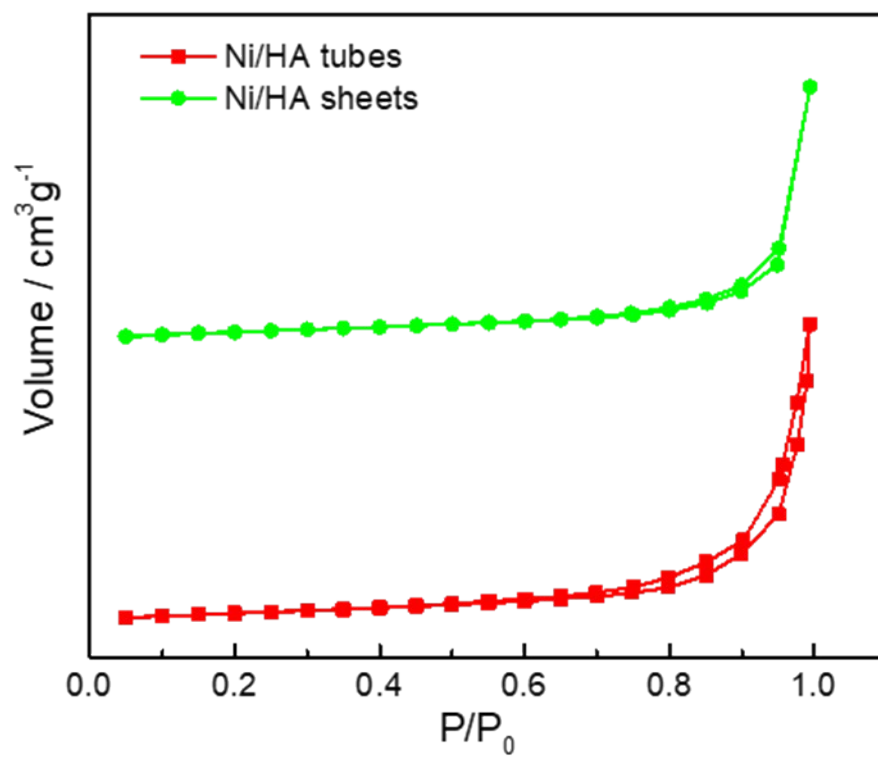

**Fig. S8** N<sub>2</sub> sorption isotherms of the spent catalysts after the 20 h stability test.

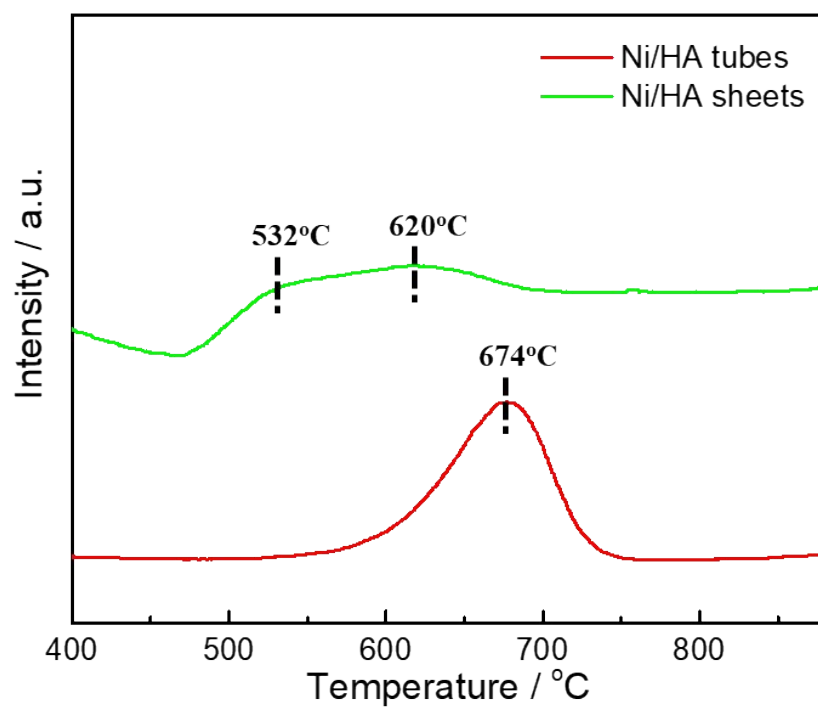

**Fig. S9** O<sub>2</sub>-TPO profiles of the spent catalysts after the 20 h stability test.

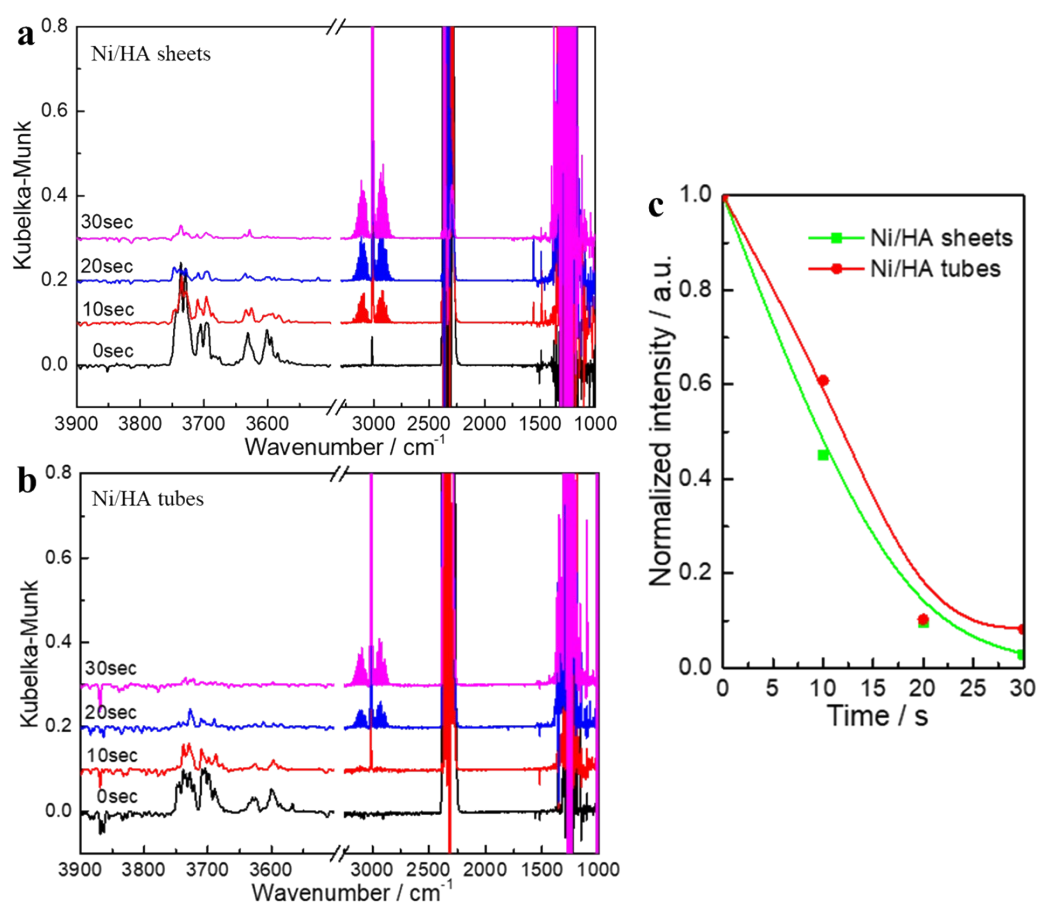

**Fig. S10** *In situ* DRIFTS spectra of transient reactions over (a) Ni/HA sheets; (b) Ni/HA tubes catalysts after the CO<sub>2</sub> adsorption at 500 °C for 1 h and then exposed to CH<sub>4</sub>; (c) consumption rate of Si-OH species over the Ni/HA sheets and Ni/HA tubes catalysts upon passing CH<sub>4</sub>.

*In situ* DRIFTS of transient reactions over Ni/HA sheets and Ni/HA tubes catalysts was carried out to clarify the reaction mechanisms. First, the sample in the DRIFTS cell was pre-treated at 300 °C under a 50 ml/min N<sub>2</sub> atmosphere and kept at this temperature for 30 min. Then, the catalysts were pre-adsorbed by CO<sub>2</sub> at 500 °C for 1 h. After that, CH<sub>4</sub> introduced into the cell and spectra were obtained by collecting 16 scans with a resolution of 4 cm<sup>-1</sup>. From the *in situ* DRIFTS spectra, the gas phase CH<sub>4</sub> can be easily discerned at wavenumbers 3015 and 1304 cm<sup>-1</sup> and CO<sub>2</sub> peaks appeared at 2360 and 2340 cm<sup>-1</sup>, respectively (Fig. S10a-b). The intensity of Si-OH peaks at 3694-3800 cm<sup>-1</sup> over both the Ni/HA sheets and Ni/HA tubes disappeared while exposing to CH<sub>4</sub>. In addition, the intensity of Si-OH over Ni/HA sheets decreases rapidly than that of Ni/HA tubes with flowing CH<sub>4</sub> stream due to the strong interaction between Ni and HA sheets (Fig. S10c). We can also conclude that bidentate formate species at 2878 cm<sup>-1</sup> dominate over bicarbonates detected at 1419 and 1224 cm<sup>-1</sup> on the surface of the catalysts. It means that H<sup>\*</sup> is produced via dissociation of CH<sub>4</sub> on Ni particles which accelerates the formation of transition from bicarbonate.

## Reference

1. V. M. Gonzalez-Delacruz, R. Pereñíguez, F. Ternero, J. P. Holgado and A. Caballero, *ACS Catal.*, 2011, **1**, 82-88.
2. M. Akri, T. Chafik, P. Granger, P. Ayrault and C. Batiot-Dupeyrat, *Fuel*, 2016, **178**, 139-147.
3. S. Wen, M. Liang, J. Zou, S. Wang, X. Zhu, L. Liu and Z.-j. Wang, *J. Mater. Chem. A*, 2015, **3**, 13299-13307.
4. T. V. Sagar, N. Sreelatha, G. Hanmant, M. Surendar, N. Lingaiah, K. S. Rama Rao, C. V. V. Satyanarayana, I. A. K. Reddy and P. S. Sai Prasad, *RSC Adv.*, 2014, **4**, 50226-50232.
5. M. Akri, S. Pronier, T. Chafik, O. Achak, P. Granger, P. Simon, M. Trentesaux and C. Batiot-Dupeyrat, *Appl. Catal. B.*, 2017, **205**, 519-531.
6. S. Zhang, S. Muratsugu, N. Ishiguro and M. Tada, *ACS Catal.*, 2013, **3**, 1855-1864.
7. W.-J. Jang, H.-M. Kim, J.-O. Shim, S.-Y. Yoo, K.-W. Jeon, H.-S. Na, Y.-L. Lee, D.-W. Jeong, J. W. Bae, I. W. Nah and H.-S. Roh, *Green Chem.*, 2018, **20**, 1621-1633.
8. J.-H. Park, S. Yeo, T.-J. Kang, I. Heo, K.-Y. Lee and T.-S. Chang, *Fuel*, 2018, **212**, 77-87.
